# Supplementary material for: Bandgap engineering of few-layered MoS2 with low concentrations of S vacancies
Source: Royal Society of Chemistry journal article supplement (doi:10.1039/d0ra01676d), 2020-01-01
Supplement: d0ra01676d1.pdf [file d0ra01676d1.pdf]

Supporting Information

## **Band gap engineering of few-layered MoS<sub>2</sub> with low concentration of S vacancies**

Wen He <sup>1, 2</sup>, Jia Shi <sup>3, 4</sup>, Hongkang Zhao <sup>1</sup>, Hui Wang <sup>2, a)</sup>, Xinfeng Liu <sup>3, b)</sup>,  
Xinghua Shi <sup>2, 4 c)</sup>

<sup>1</sup> *School of Physics, Beijing Institute of Technology, Beijing 100081, China*

<sup>2</sup> *Laboratory of Theoretical and Computational Nanoscience, CAS Key Laboratory for Nanosystem and Hierarchy Fabrication, CAS Center for Excellence in Nanoscience, National Center for Nanoscience and Technology, Chinese Academy of Sciences, Beijing 100190, China*

<sup>3</sup> *CAS Key Laboratory of Standardization and Measurement for Nanotechnology, CAS Center for Excellence in Nanoscience, National Center for Nanoscience and Technology, Chinese Academy of Sciences, Beijing 100190, China*

<sup>4</sup> *University of Chinese Academy of Sciences, No. 19A Yuquan Road, Beijing 100049, China*

a) E-mail: wangh@nanoctr.cn

b) E-mail: liuxf@nanoctr.cn

c) E-mail: shixh@nanoctr.cn

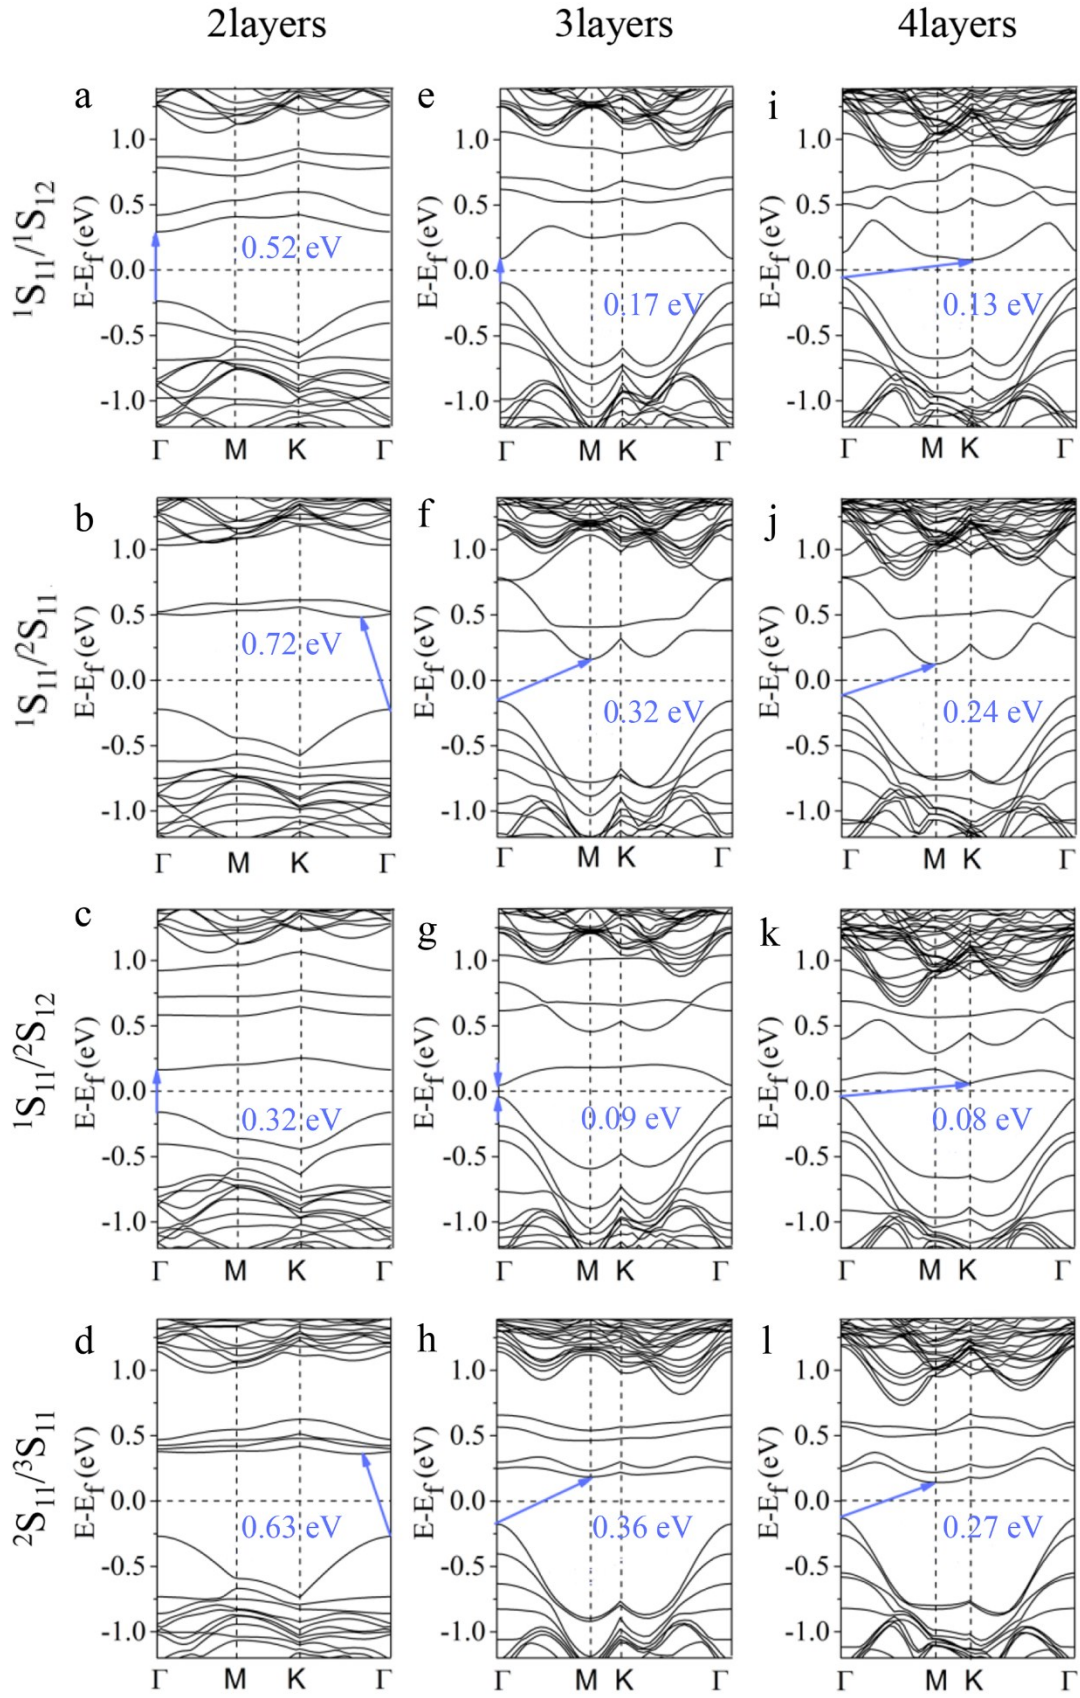

Fig.S1 Band structures for (a-d) 2-, (e-h) 3-, (i-l) 4-layered MoS<sub>2</sub> with  $1S_{11}/1S_{12}$ ,  $1S_{11}/2S_{11}$ ,  $1S_{11}/2S_{12}$ ,  $2S_{11}/3S_{11}$  combinational vacancies at 4% average concentrations.

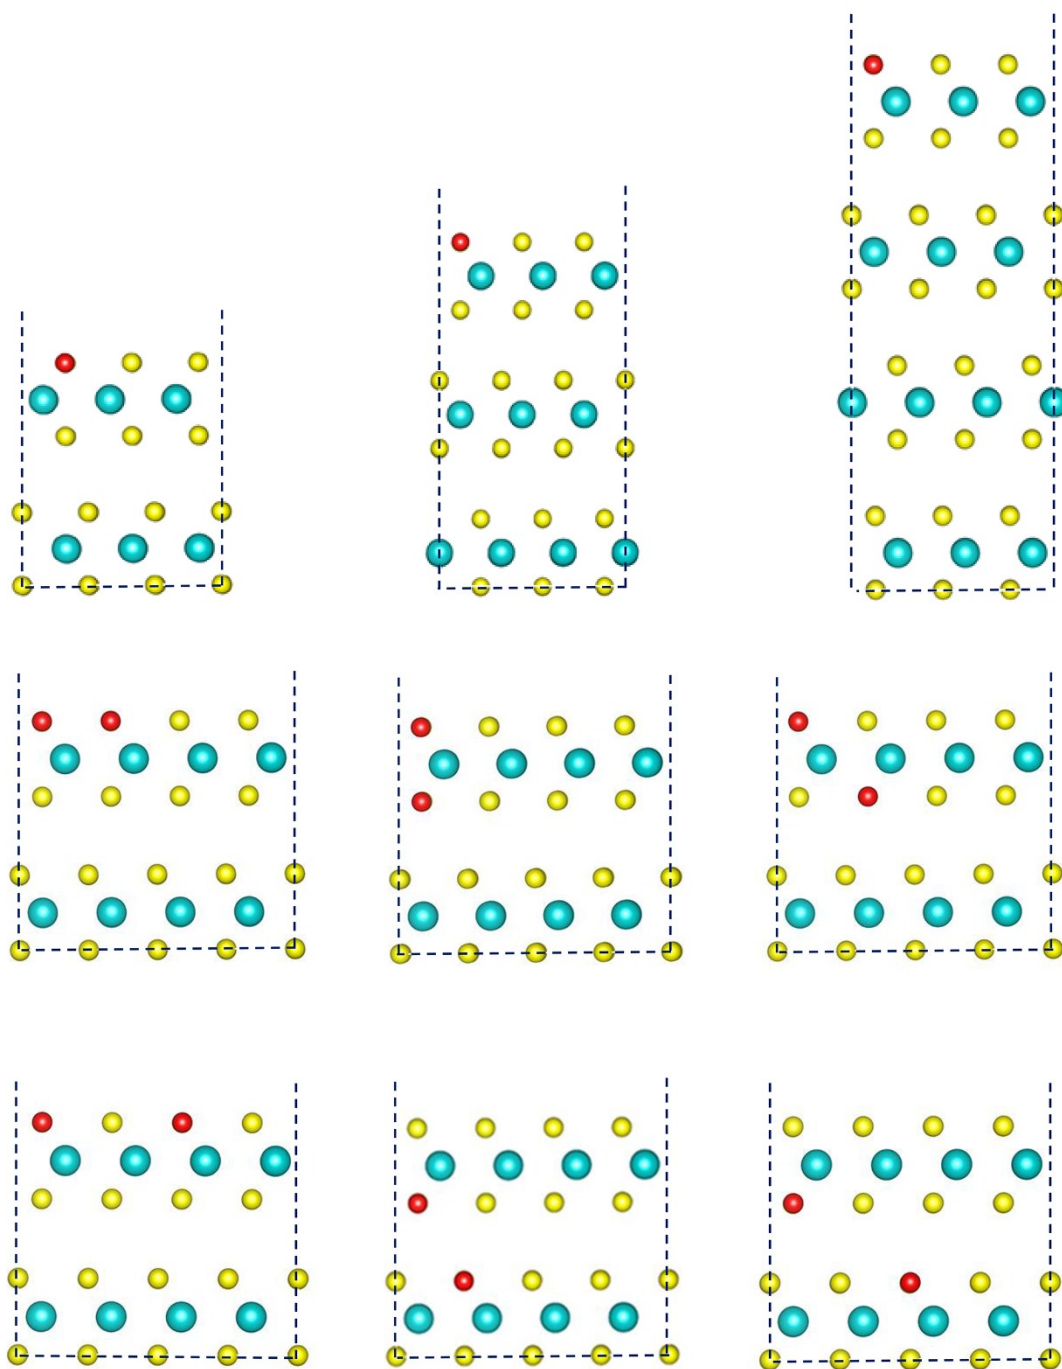

Fig.S2 The structures of MoS<sub>2</sub> with S vacancies (blue, yellow and red balls represent Mo, S atoms and vacancies, respectively).
